# Supplementary material for: Potent carbonic anhydrase I, II, IX and XII inhibition activity of novel primary benzenesulfonamides incorporating bis-ureido moieties
Source: PubMed Central journal article supplement (PMC9987750; doi:10.1080/14756366.2023.2185762), 2023-03-02
Supplement: IENZ_A_2185762_SM0422.pdf [file IENZ_A_2185762_SM0422.pdf]

## Supporting Information

### **Potent carbonic anhydrase I, II, IX and XII inhibition activity of novel primary benzenesulfonamides incorporating bis-ureido moieties**

Tuba Tekeli<sup>a,b</sup>, Suleyman Akocak<sup>c\*</sup>, Andrea Petreni<sup>d</sup>, Nebih Lolak<sup>c</sup>, Servet Çete<sup>b</sup>, Claudiu T.

Supuran<sup>d\*</sup>

*<sup>a</sup>Vocational School of Technical Science, Department of Chemistry and Chemical Processing Technologies, Adiyaman University, 02040 Adiyaman, Türkiye*

*<sup>b</sup>Department of Chemistry, Faculty of Science, Gazi University, Ankara, Türkiye*

*<sup>c</sup>Department of Pharmaceutical Chemistry, Faculty of Pharmacy, Adiyaman University, 02040 Adiyaman, Türkiye*

*<sup>d</sup>Università degli Studi di Firenze, NEUROFARBA Dept., Sezione di Scienze Farmaceutiche, Via Ugo Schiff 6, 50019 Sesto Fiorentino (Florence), Italy*

---

\*Corresponding authors: Tel: +90 (416) 223 3800-2836, Fax: +90 (416) 223 3842, E-mail: [akocaksuleyman@gmail.com](mailto:akocaksuleyman@gmail.com), [sakocak@adiyaman.edu.tr](mailto:sakocak@adiyaman.edu.tr), (Suleyman Akocak); Tel/Fax: +39-055-4573729, E-mail: [claudiu.supuran@unifi.it](mailto:claudiu.supuran@unifi.it) (Claudiu T. Supuran).

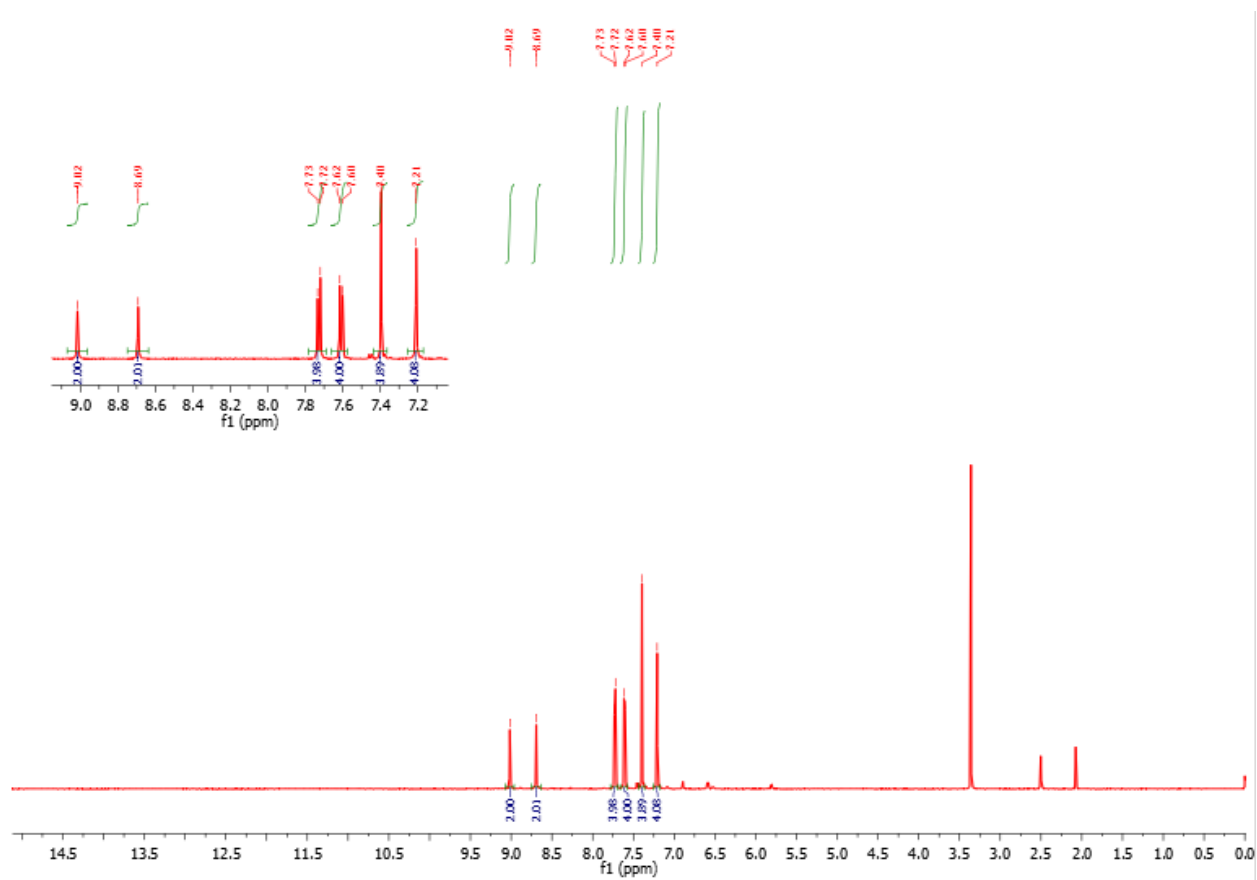

**Figure S1:** <sup>1</sup>H NMR spectrum of compound **8** (X1Y1) (500 MHz, in DMSO-d<sub>6</sub>).

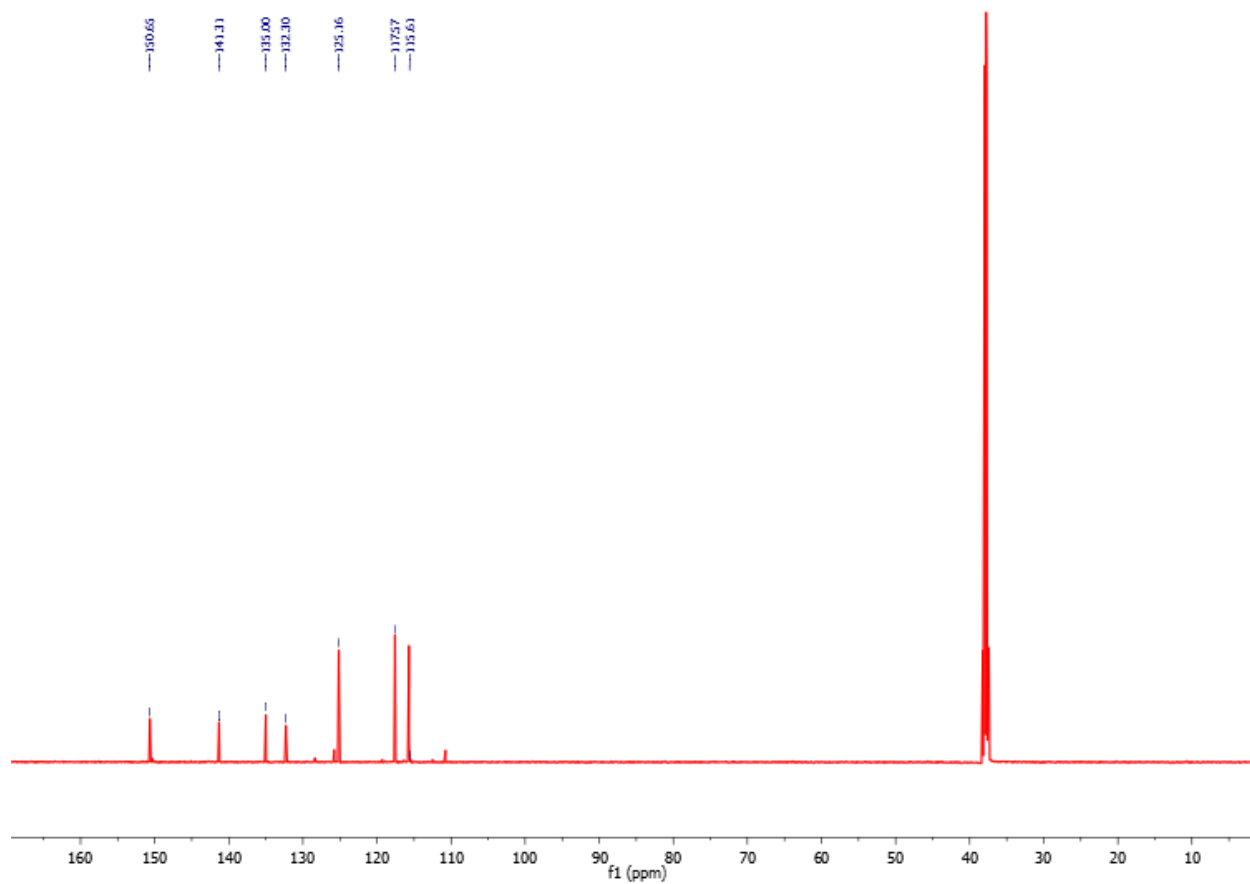

**Figure S2:** <sup>13</sup>C NMR spectrum of compound **8 (X1Y1)** (125 MHz, in DMSO-d<sub>6</sub>).

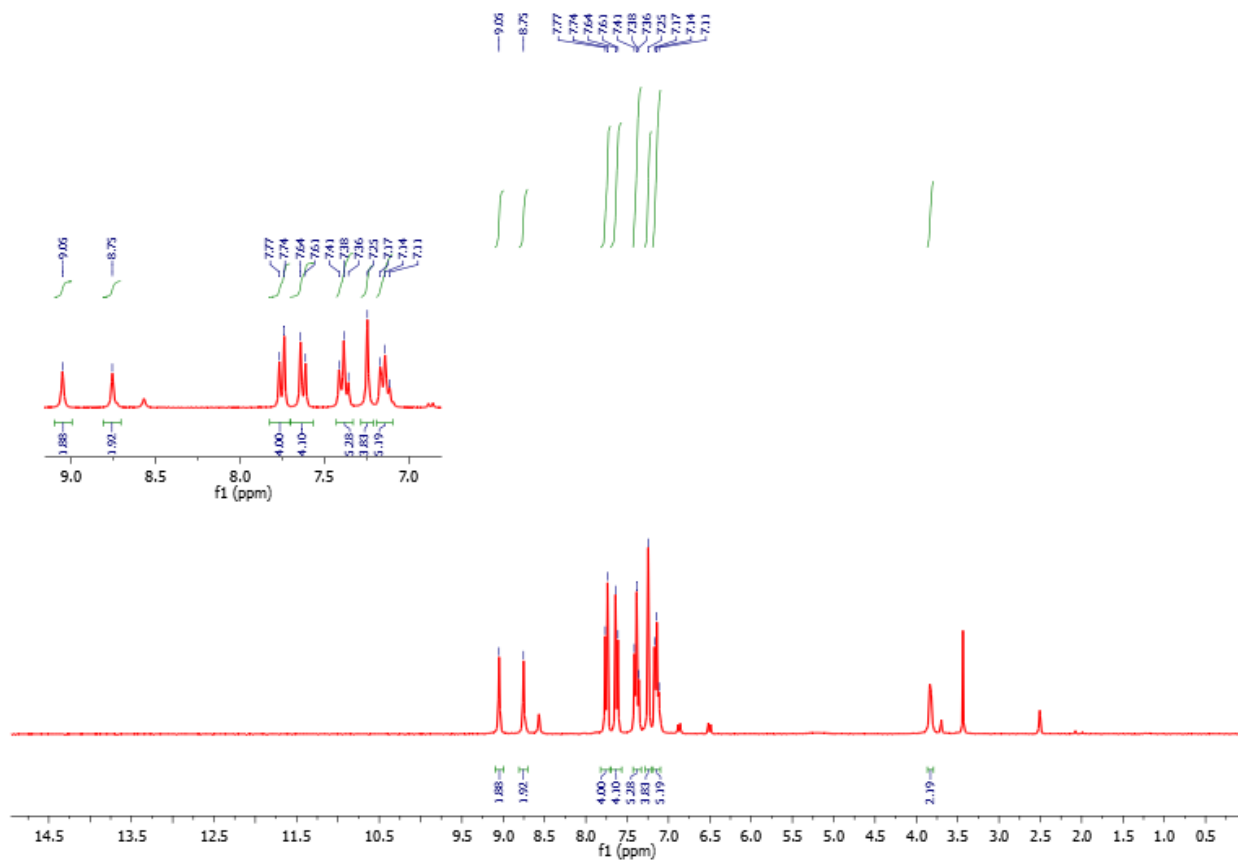

**Figure S3:** <sup>1</sup>H NMR spectrum of compound **9 (X1Y2)** (500 MHz, in DMSO-d<sub>6</sub>).

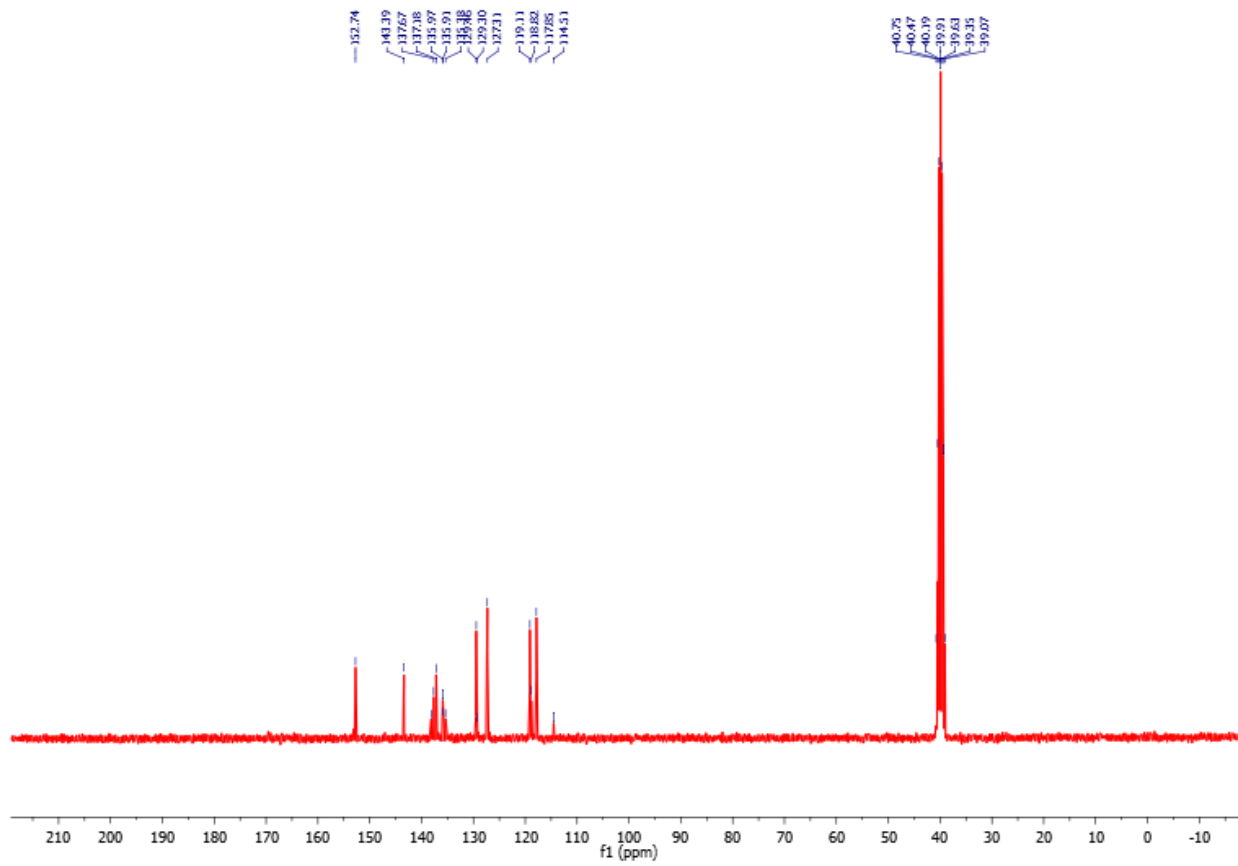

**Figure S4:** <sup>13</sup>C NMR spectrum of compound 9 (X1Y2) (125 MHz, in DMSO-d<sub>6</sub>).

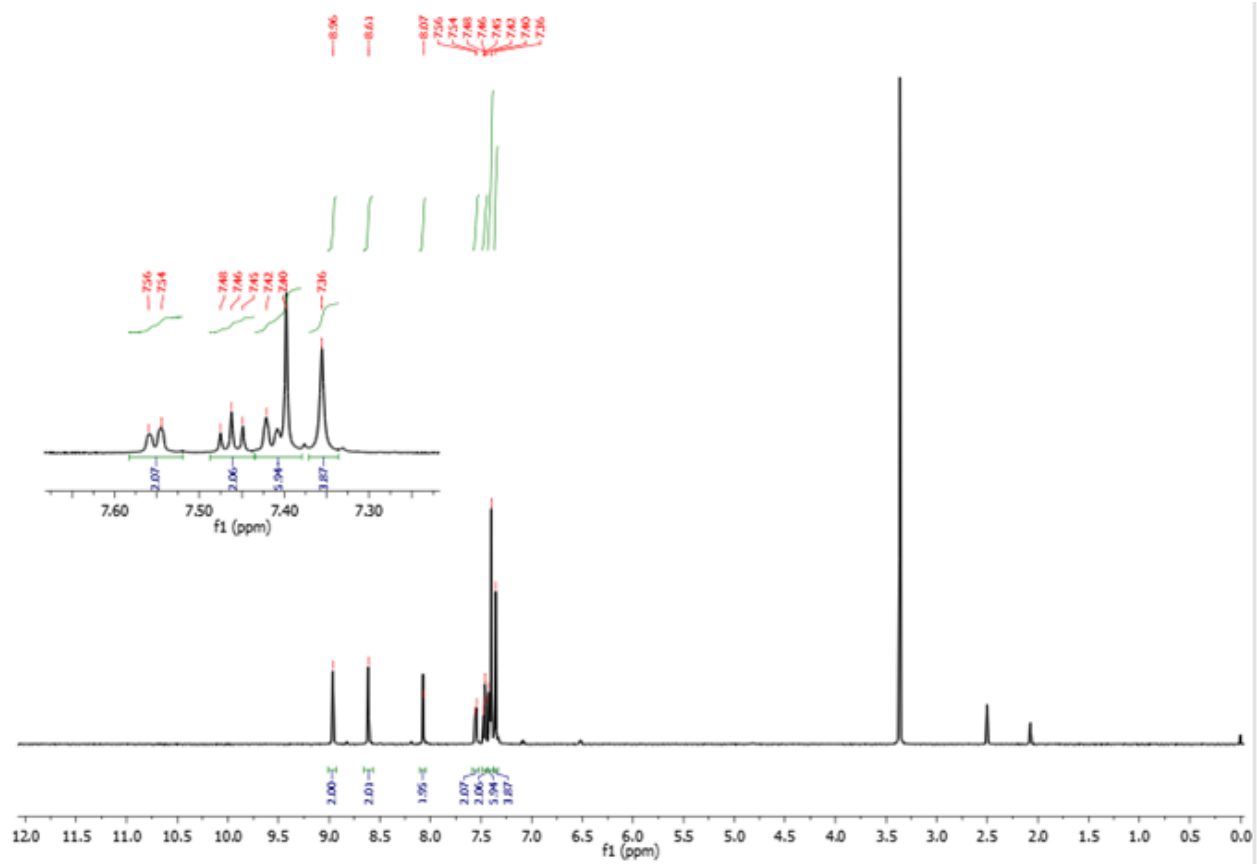

**Figure S5:** <sup>1</sup>H NMR spectrum of compound 12 (X2Y1) (500 MHz, in DMSO-d<sub>6</sub>).

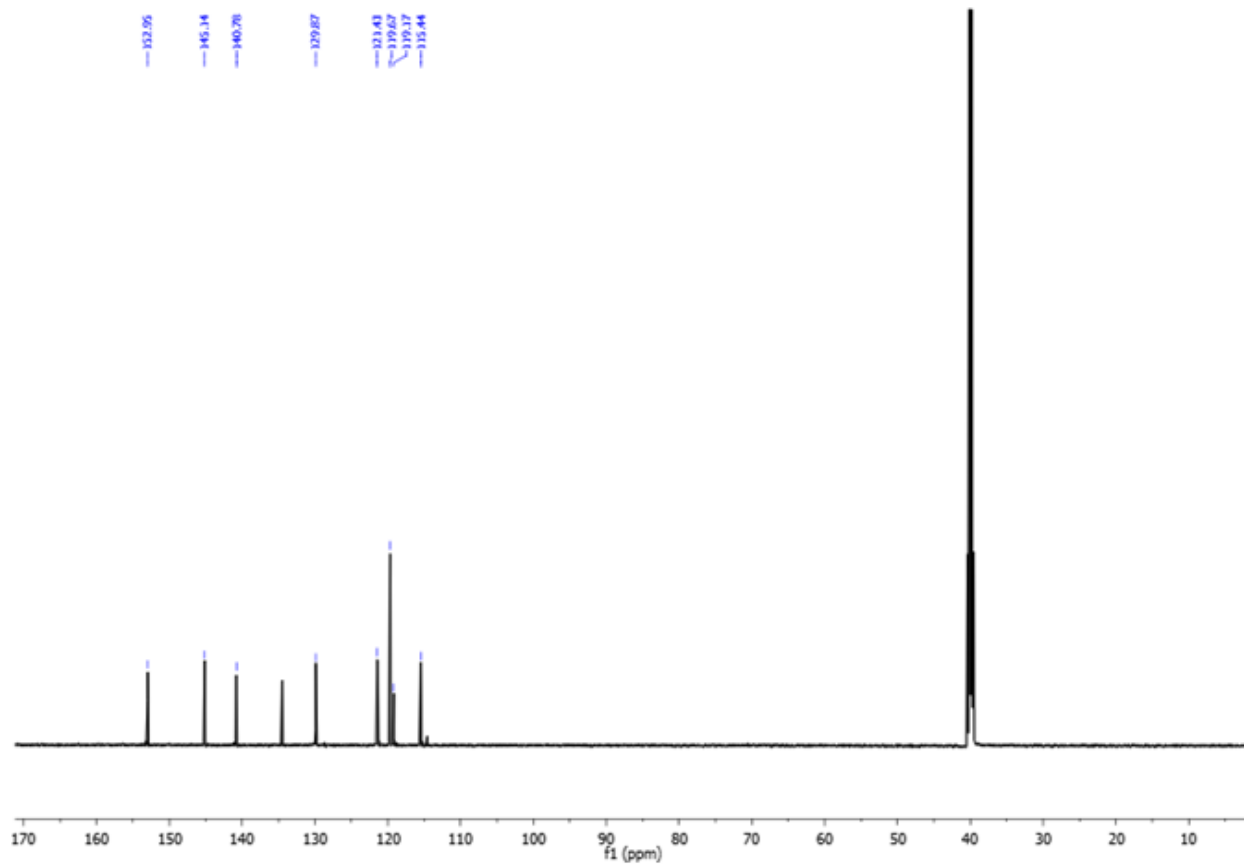

**Figure S6:** <sup>13</sup>C NMR spectrum of compound **12 (X2Y1)** (125 MHz, in DMSO-d<sub>6</sub>).

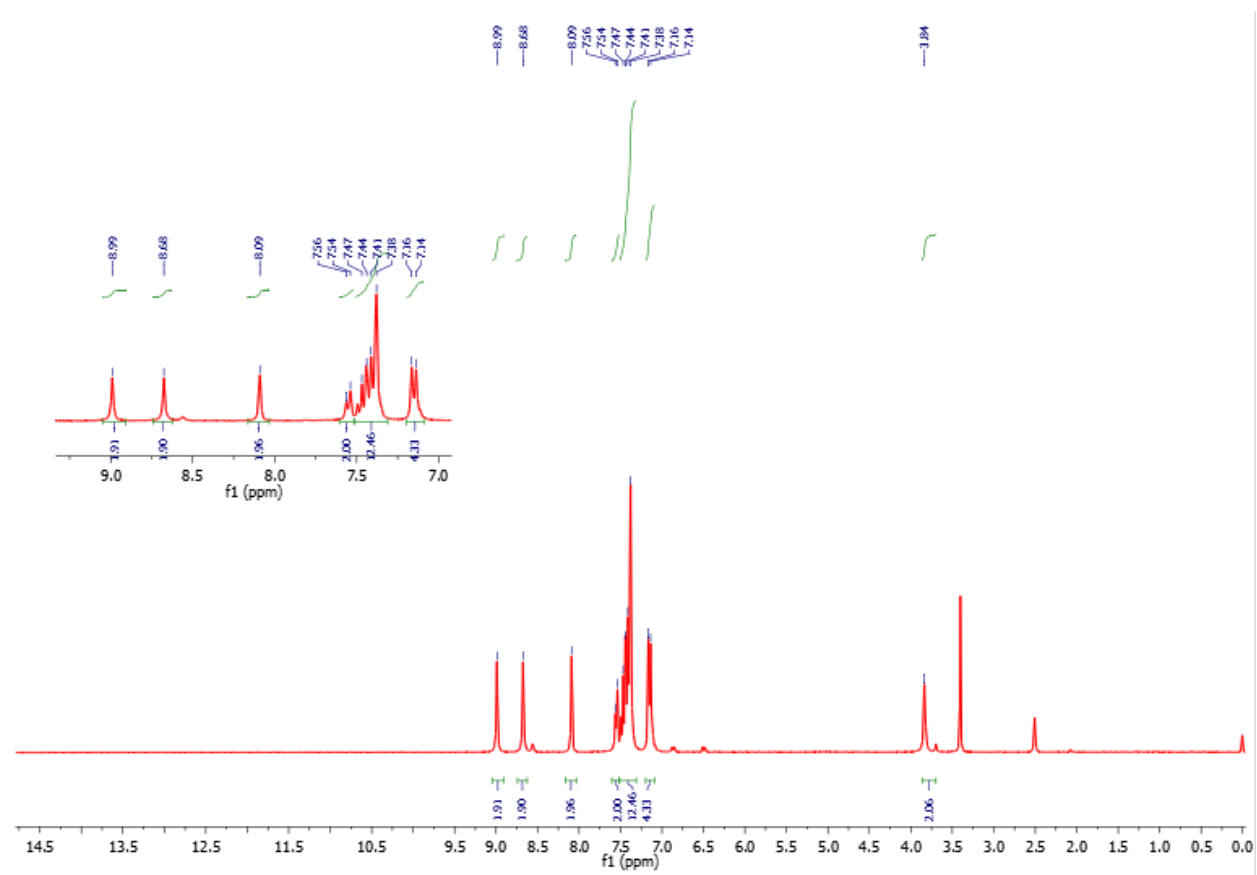

**Figure S7:** <sup>1</sup>H NMR spectrum of compound 13 (X<sub>2</sub>Y<sub>2</sub>) (500 MHz, in DMSO-d<sub>6</sub>).



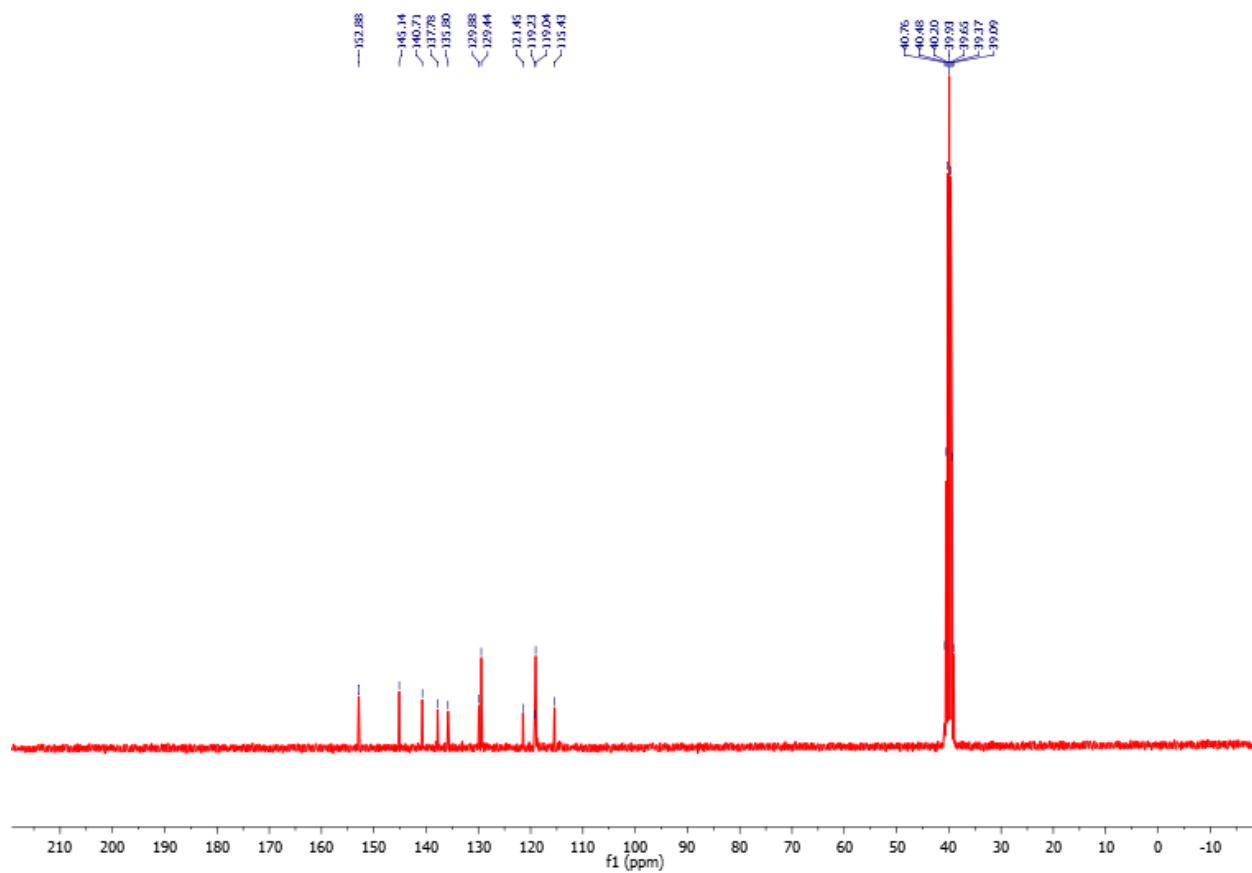

**Figure S8:**  $^{13}\text{C}$  NMR spectrum of compound **13** (X2Y2) (125 MHz, in  $\text{DMSO-d}_6$ ).

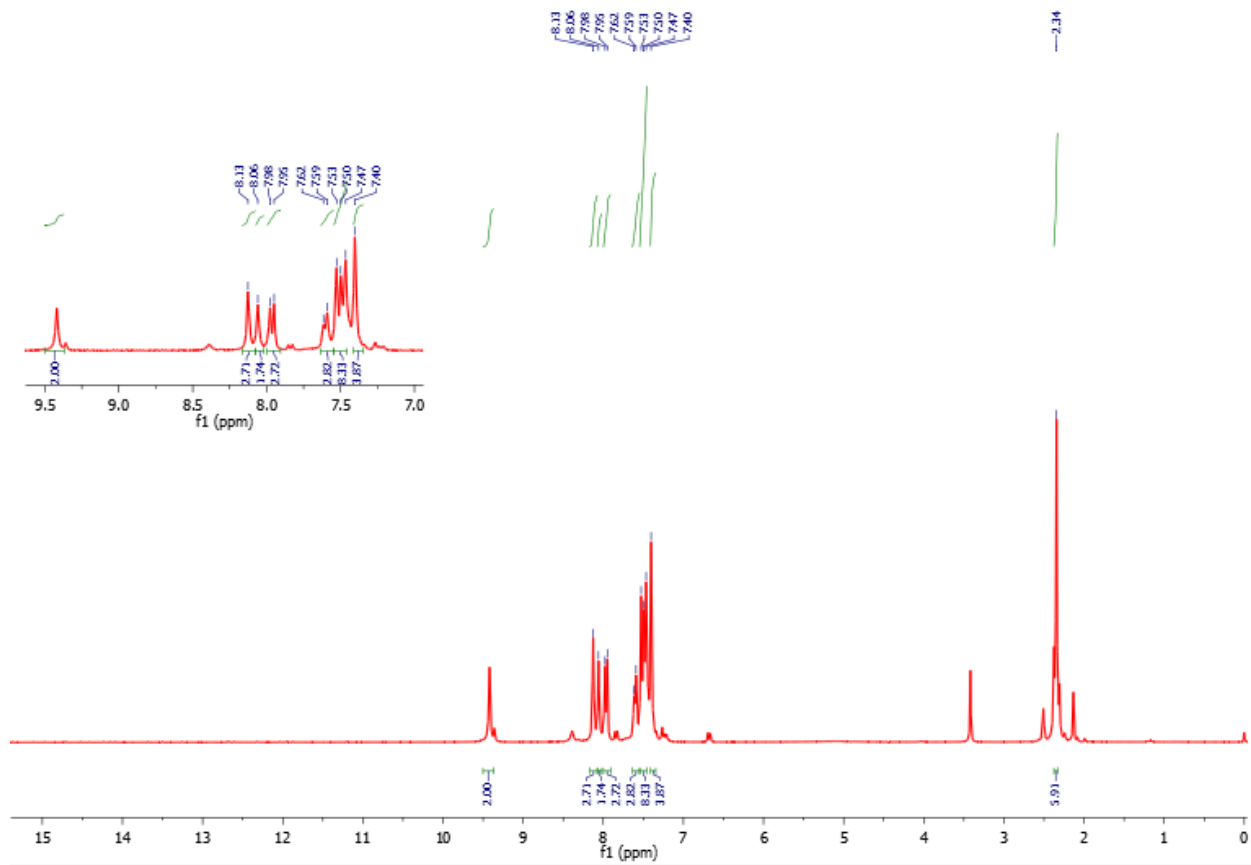

**Figure S9:** <sup>1</sup>H NMR spectrum of compound **14 (X<sub>2</sub>Y<sub>3</sub>)** (500 MHz, in DMSO-d<sub>6</sub>).

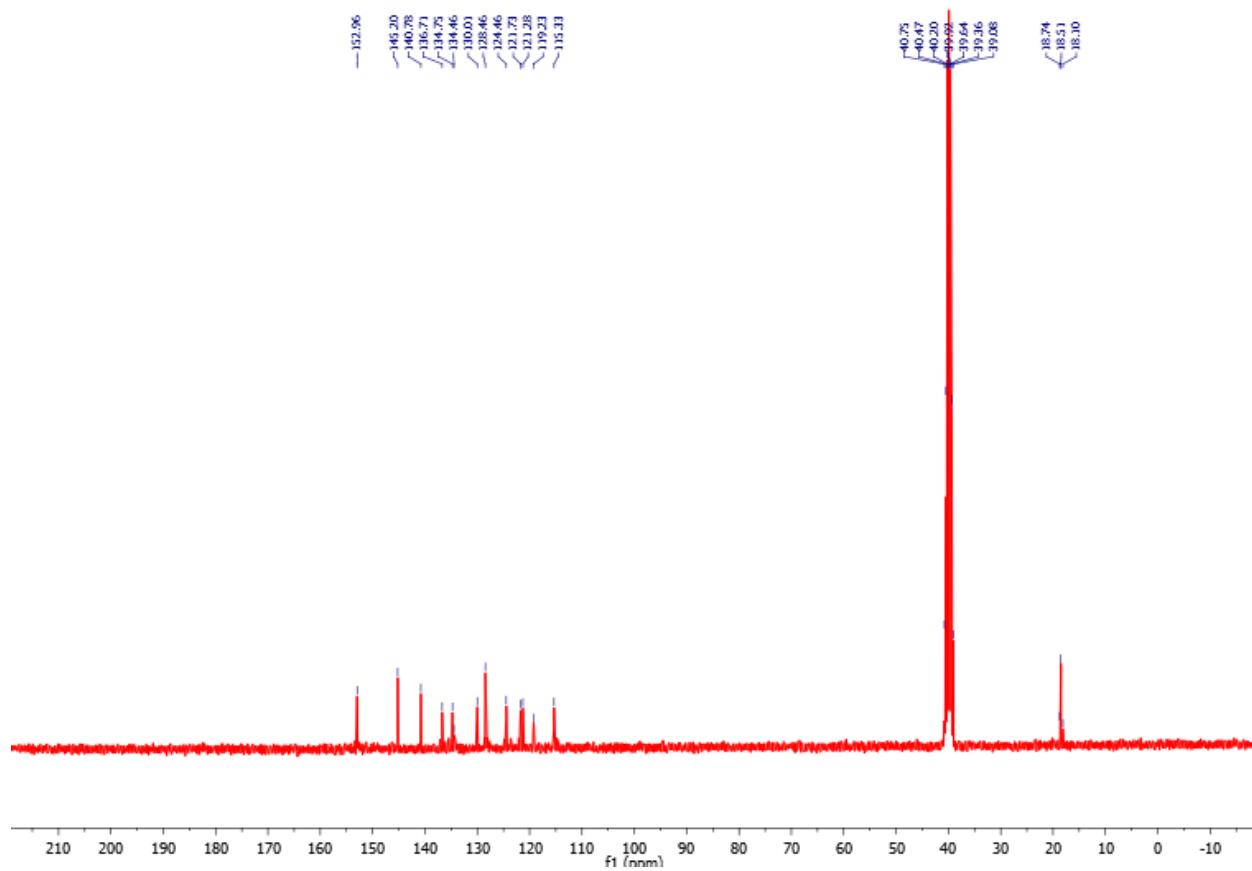

**Figure S10:**  $^{13}\text{C}$  NMR spectrum of compound **14** (X<sub>2</sub>Y<sub>3</sub>) (125 MHz, in DMSO-d<sub>6</sub>).

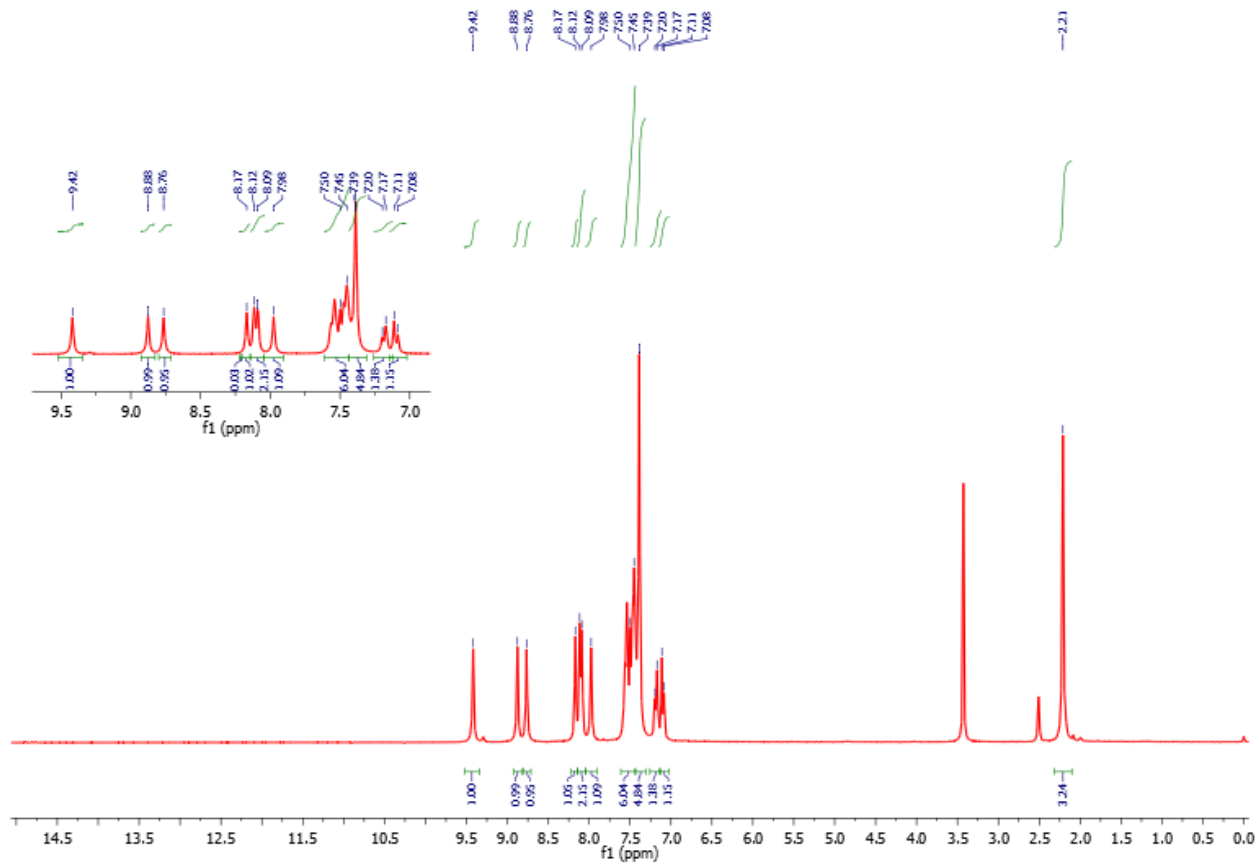

**Figure S11:** <sup>1</sup>H NMR spectrum of compound **15 (X<sub>2</sub>Y<sub>4</sub>)** (500 MHz, in DMSO-d<sub>6</sub>).

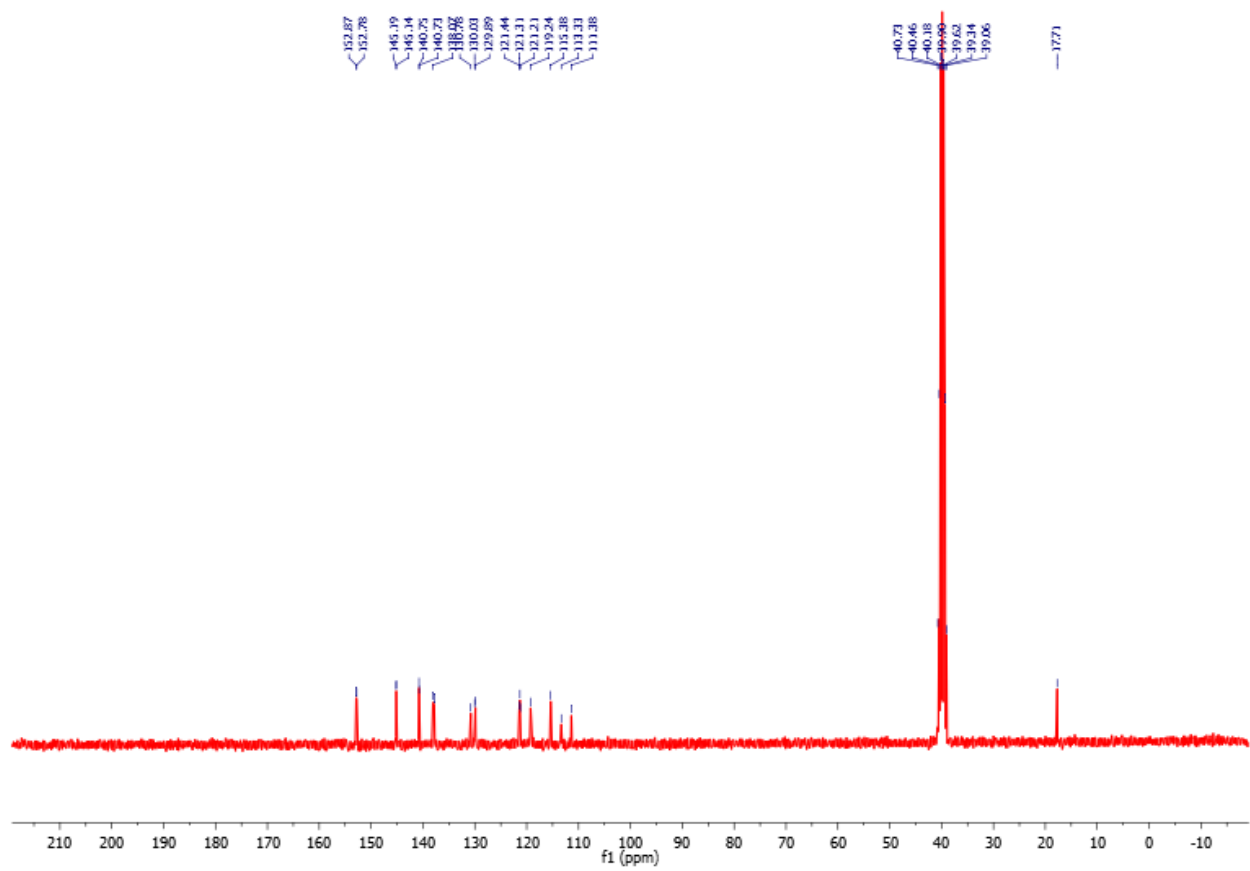

**Figure S12:**  $^{13}\text{C}$  NMR spectrum of compound 15 (X2Y4) (125 MHz, in DMSO- $d_6$ ).

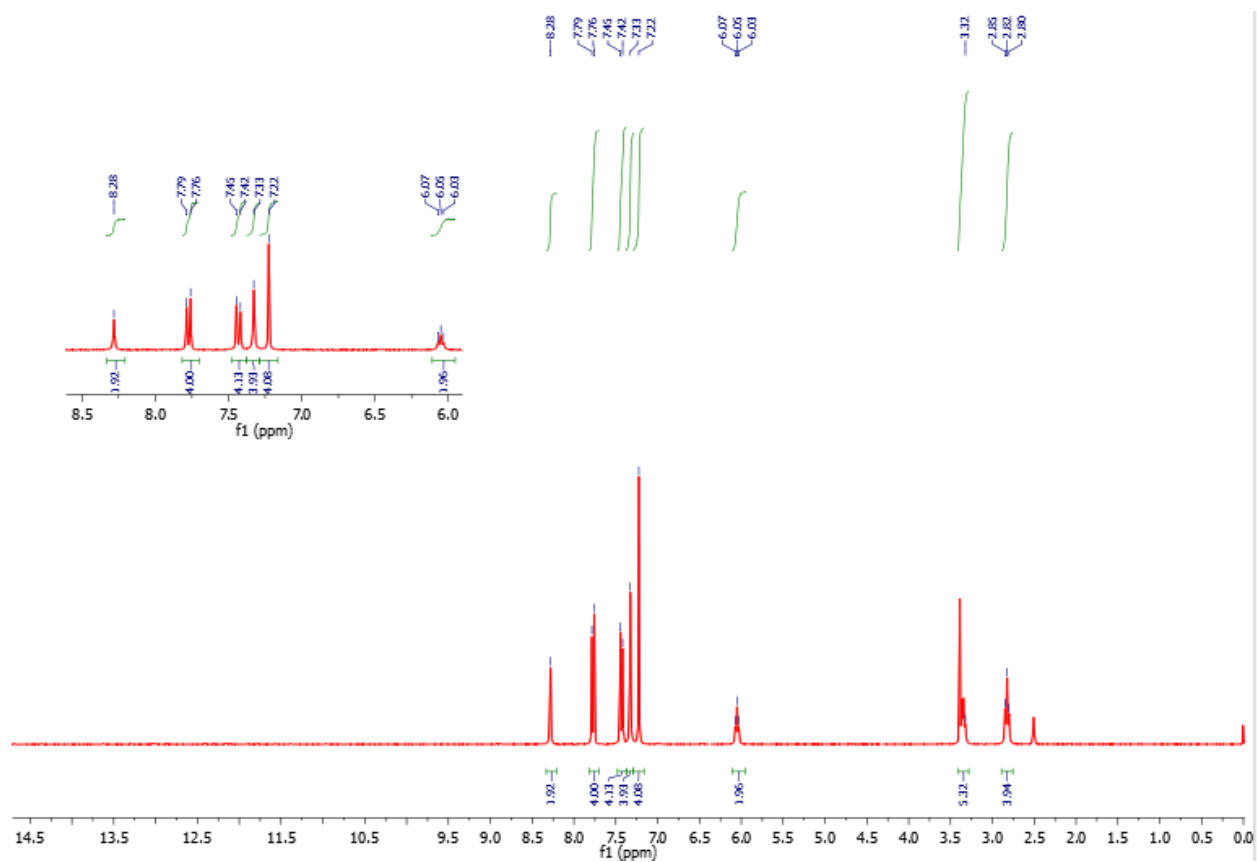

**Figure S13:** <sup>1</sup>H NMR spectrum of compound 16 (X3Y1) (500 MHz, in DMSO-d<sub>6</sub>).

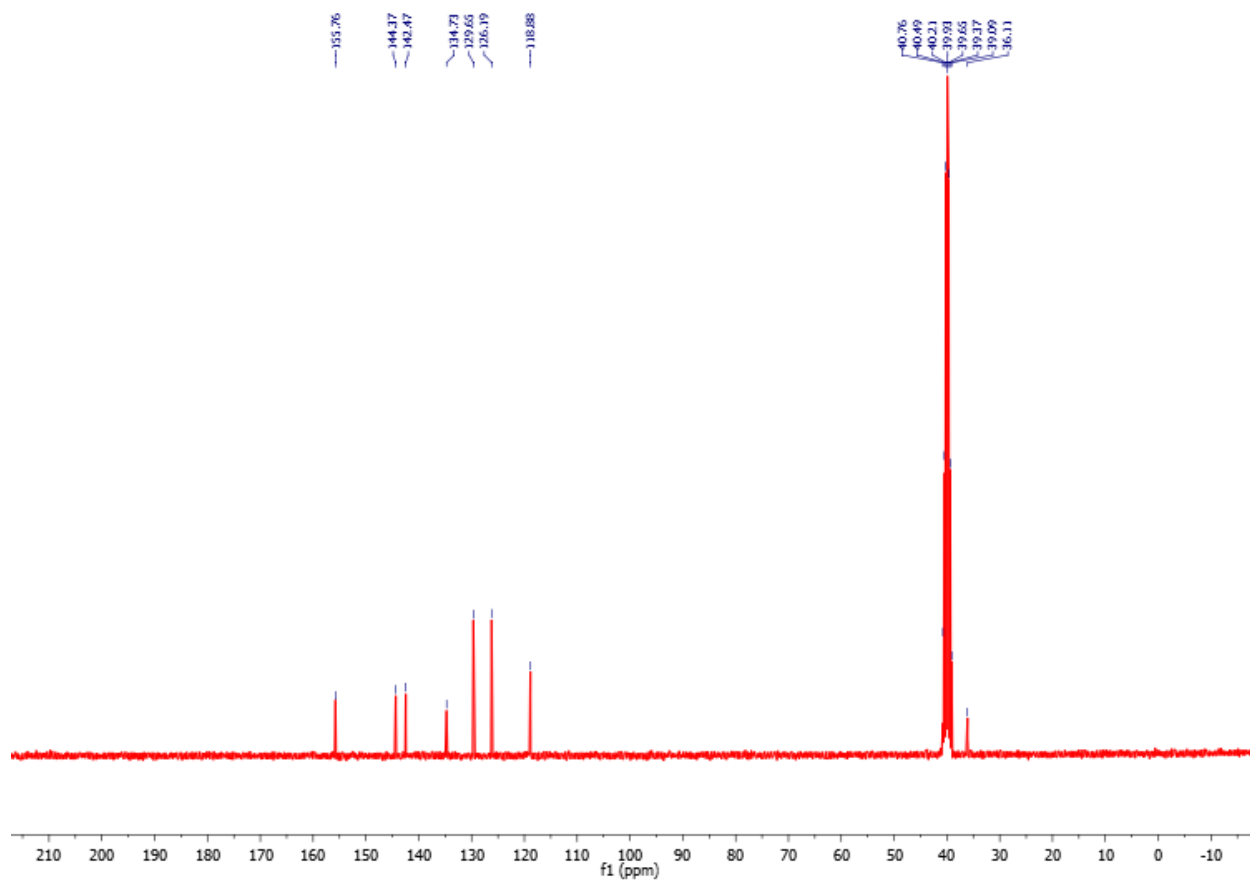

**Figure S14:**  $^{13}\text{C}$  NMR spectrum of compound 16 (X3Y1) (125 MHz, in  $\text{DMSO-d}_6$ ).

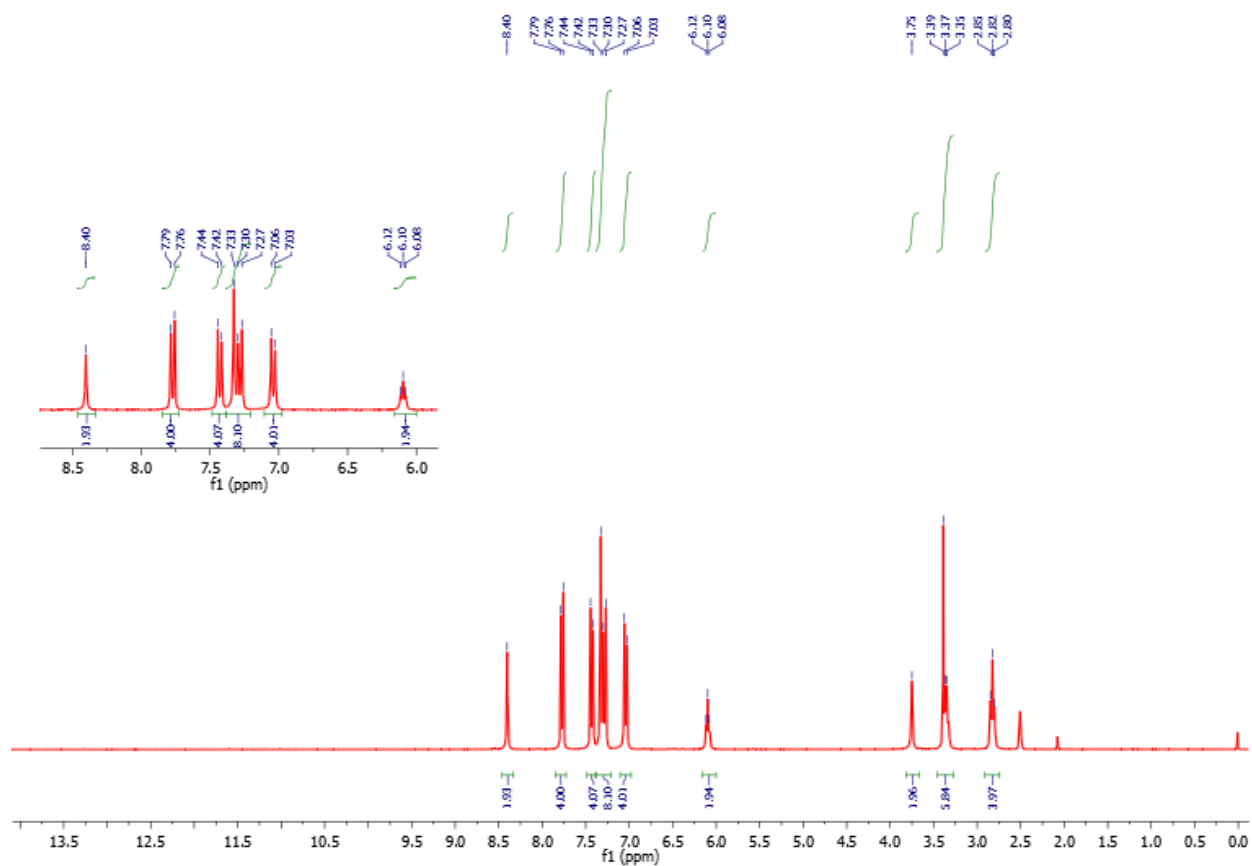

**Figure S15:** <sup>1</sup>H NMR spectrum of compound **17** (X3Y2) (500 MHz, in DMSO-d<sub>6</sub>).



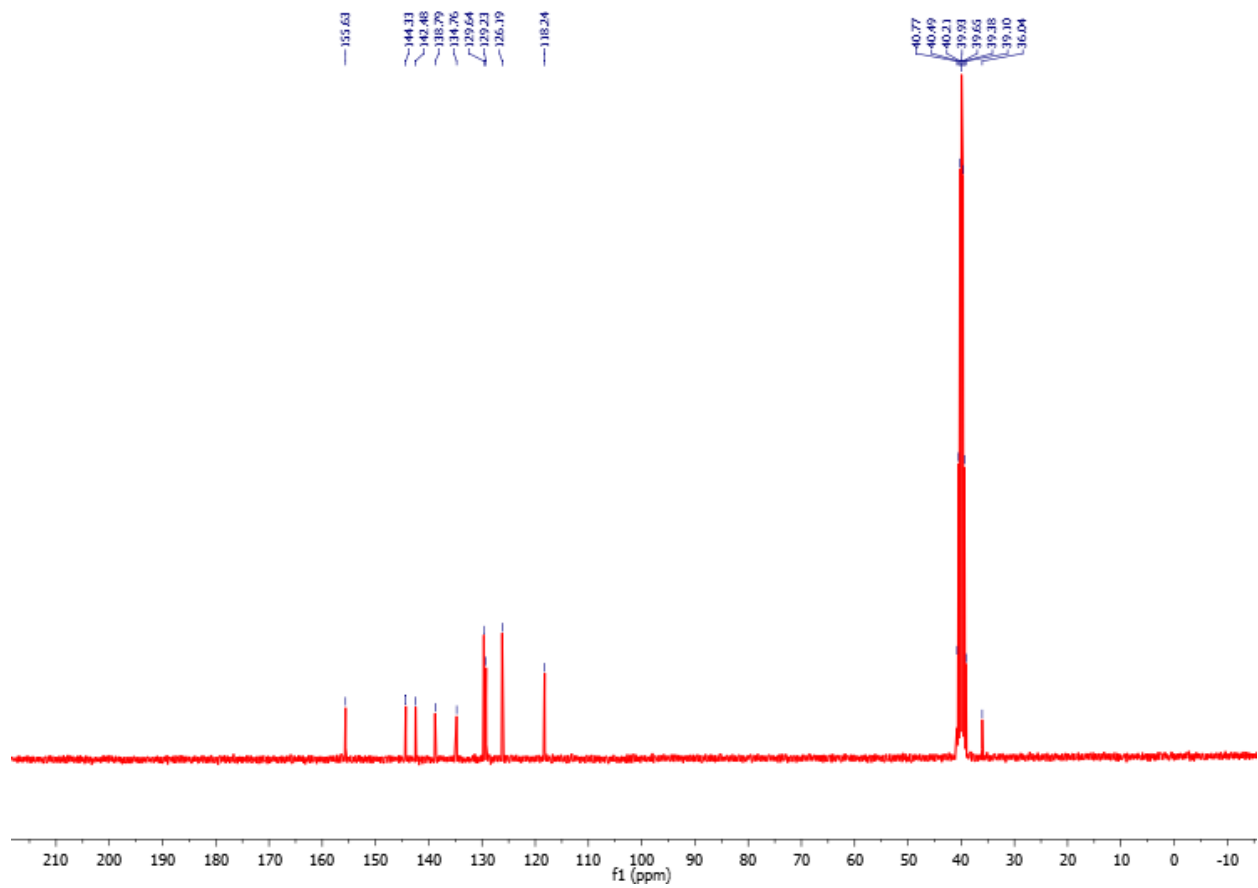

**Figure S16:** <sup>13</sup>C NMR spectrum of compound **17** (X3Y2) (125 MHz, in DMSO-d<sub>6</sub>).

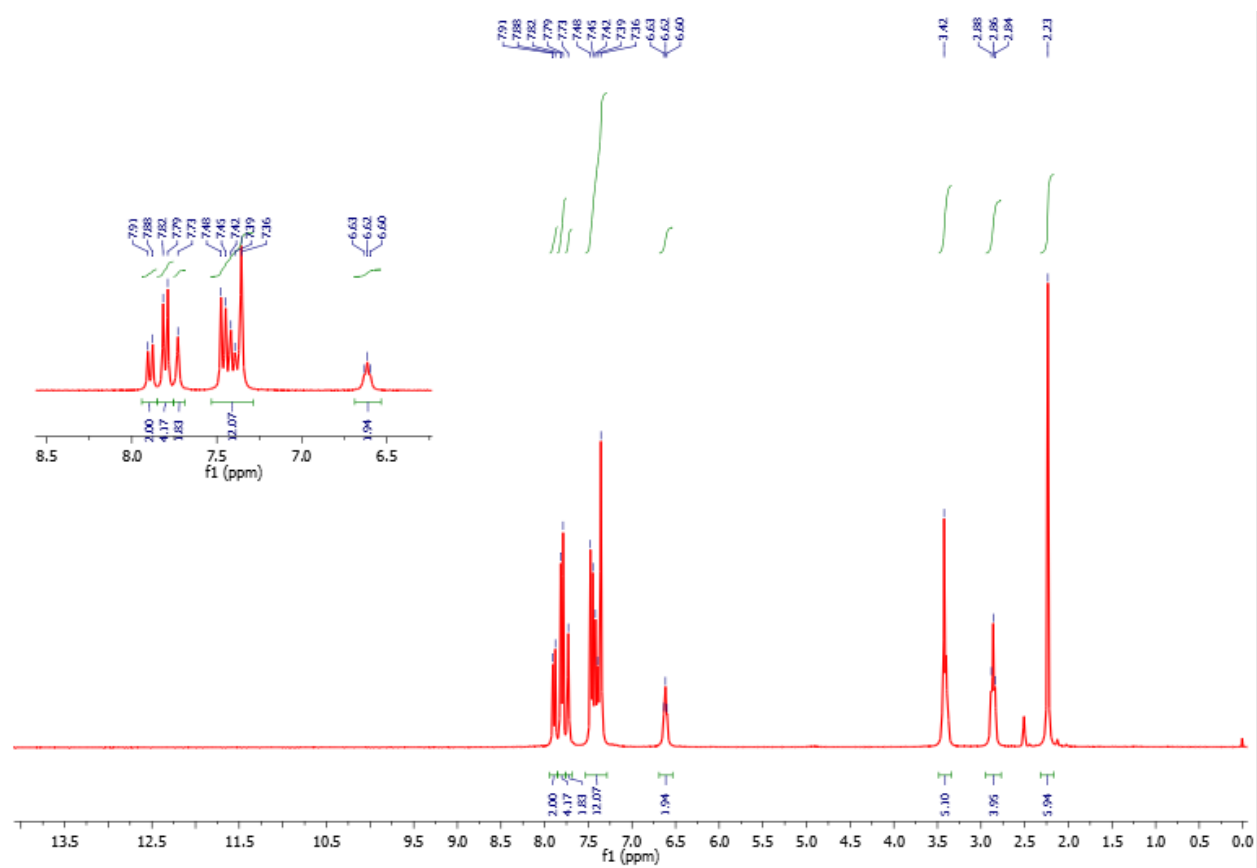

**Figure S17:**  $^1\text{H}$  NMR spectrum of compound **18** ( $\text{X}_3\text{Y}_3$ ) (500 MHz, in  $\text{DMSO-d}_6$ ).

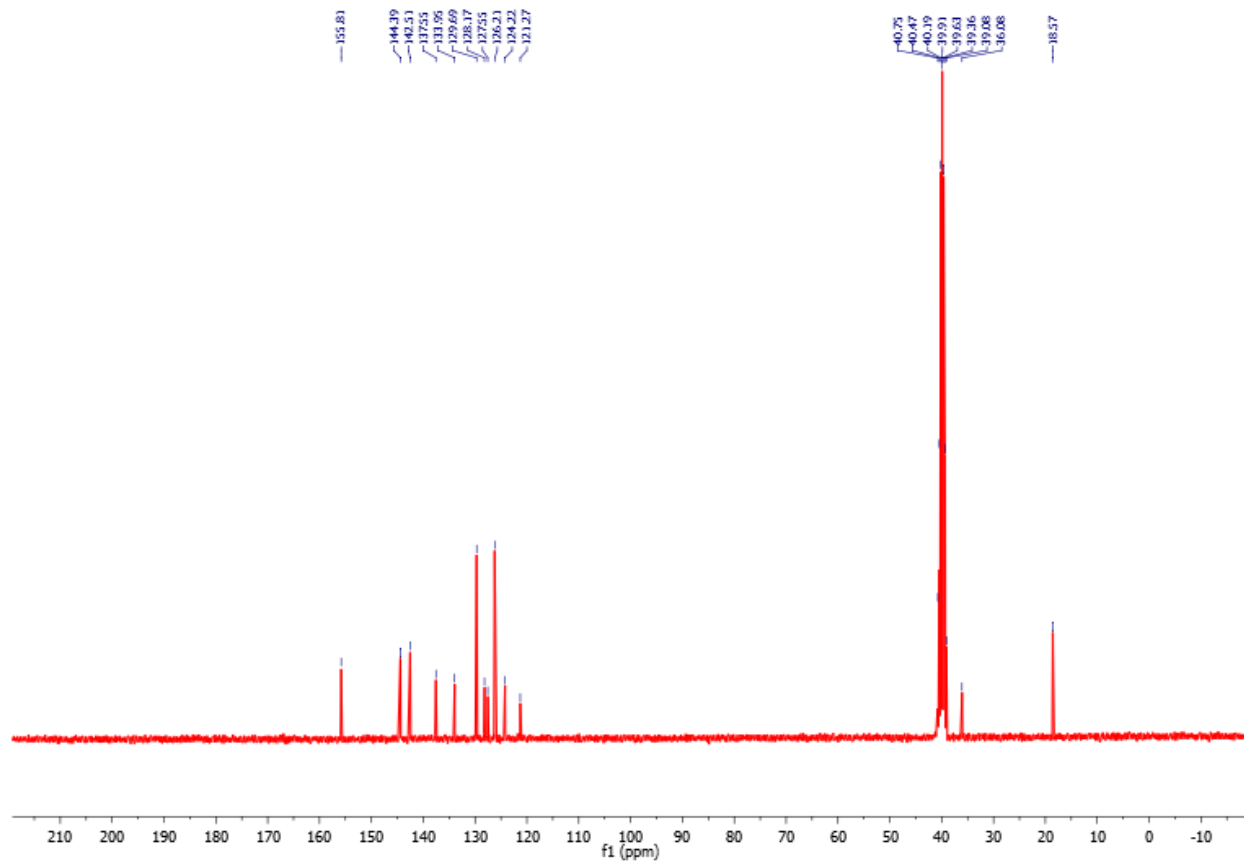

**Figure S18:**  $^{13}\text{C}$  NMR spectrum of compound **18 (X3Y3)** (125 MHz, in  $\text{DMSO-d}_6$ ).

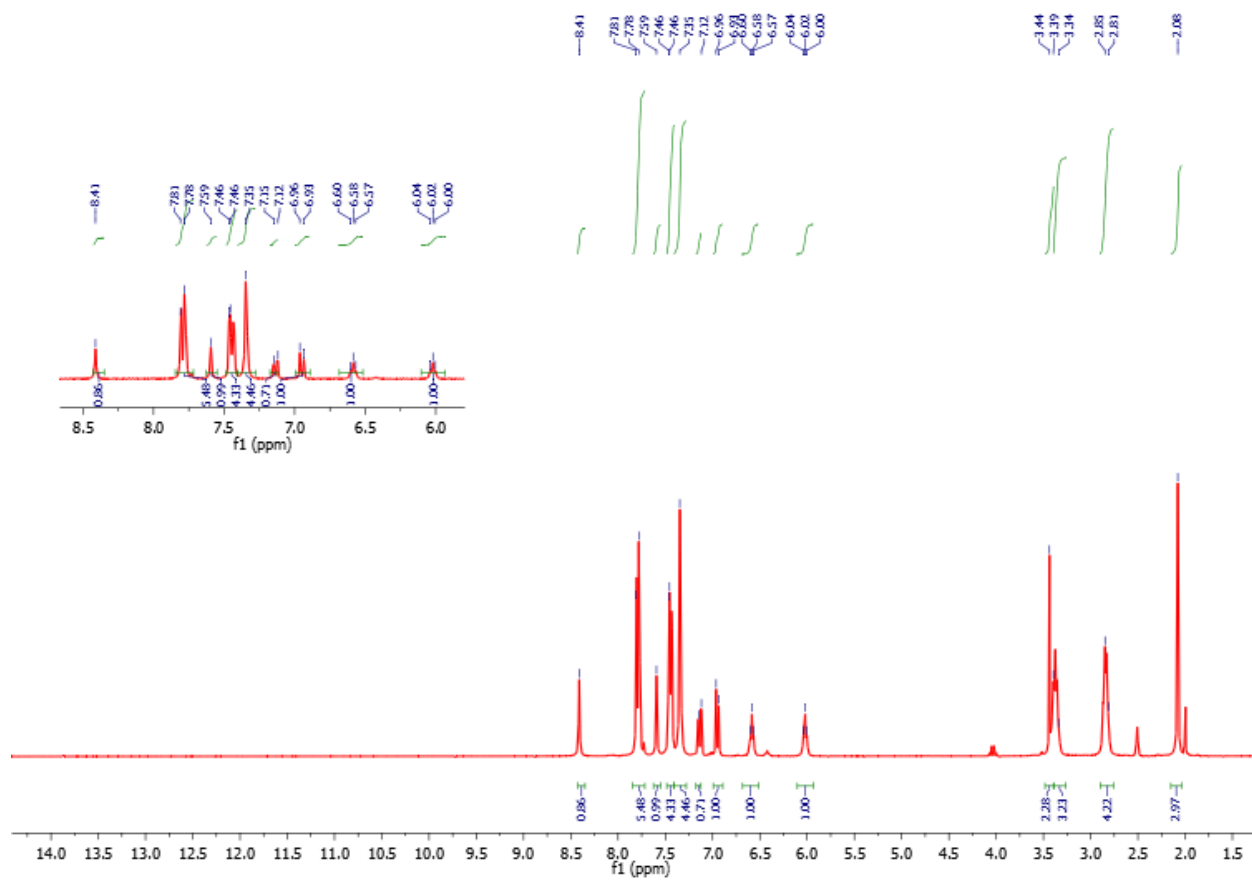

**Figure S19:** <sup>1</sup>H NMR spectrum of compound **19 (X3Y4)** (500 MHz, in DMSO-d<sub>6</sub>).

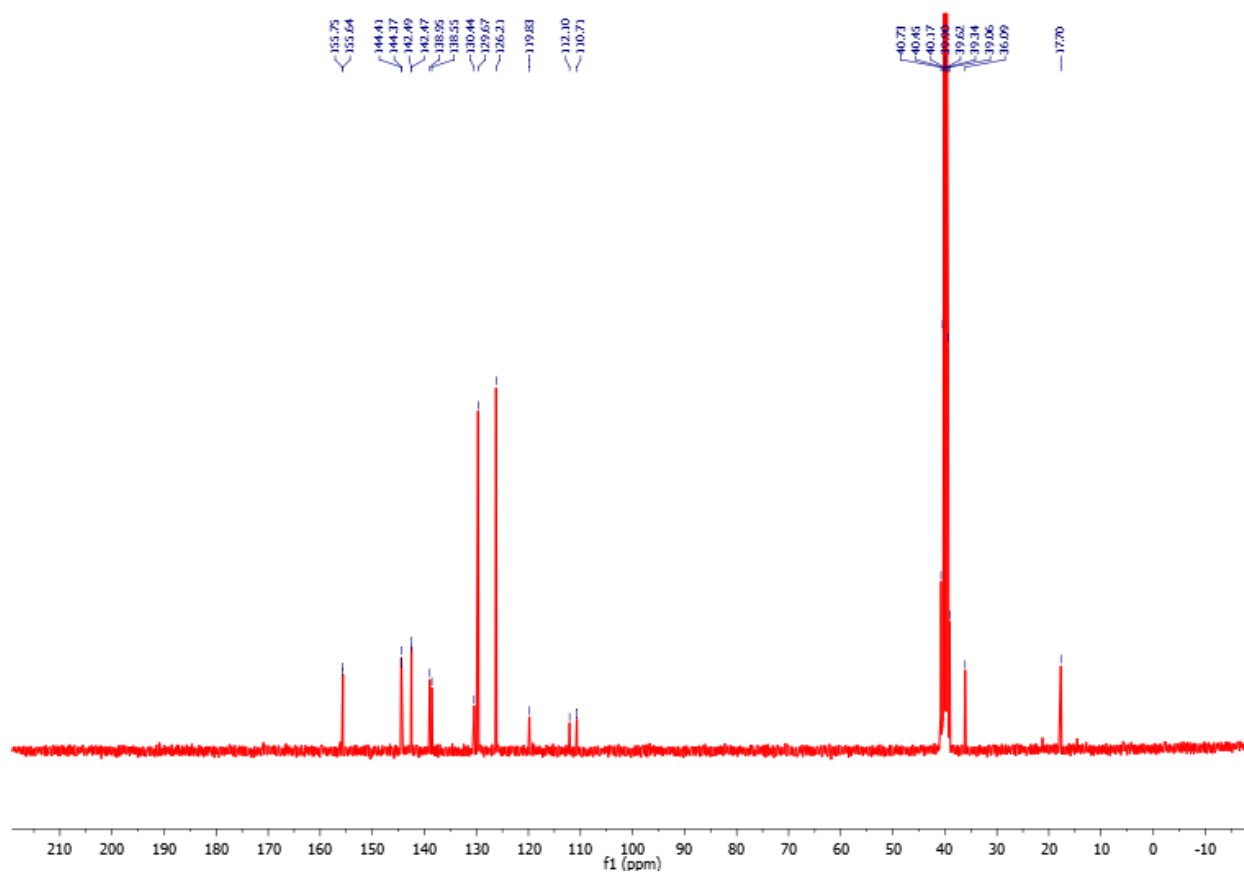

**Figure S20:**  $^{13}\text{C}$  NMR spectrum of compound **19** (X3Y4) (125 MHz, in DMSO- $d_6$ ).
